# Supplementary material
Source: HighWire-hosted journal article supplement (https://www.cmaj.ca/highwire/filestream/59058/field_highwire_adjunct_files/1/dialysis-moist-2-at.pdf)
Supplement: dialysis-moist-2-at.pdf [file dialysis-moist-2-at.pdf]

## Appendix 2: Subgroup analyses in included studies (as supplied by the authors)

| Table 1: Studies examining mortality among subgroups |                                    |                                                                      |                                            |                                                                                                          |                                                                                                                                                                                                                                     |
|------------------------------------------------------|------------------------------------|----------------------------------------------------------------------|--------------------------------------------|----------------------------------------------------------------------------------------------------------|-------------------------------------------------------------------------------------------------------------------------------------------------------------------------------------------------------------------------------------|
| Author                                               | Subgroup                           | eGFR category                                                        | No. patients                               | HR (95% CI)                                                                                              | Adjustment variables                                                                                                                                                                                                                |
| Traynor <sup>1</sup>                                 | Nondiabetics                       | ≥ 8 mL/min GFR<br>< 8 mL/min GFR                                     | 97<br>87                                   | Not reported                                                                                             |                                                                                                                                                                                                                                     |
| Kazmi <sup>2</sup>                                   | Age > 67 y                         | Per ↑ 1 mL/min GFR                                                   | 91 083                                     | M1: 1.040 (1.038–1.042)<br>M2: 1.028 (1.026–1.030)<br>M3: 1.028 (1.025–1.031)<br>M4: 1.028 (1.025–1.031) | M1: adjusted for age, sex, race, Hispanic ethnicity, BMI, cause of kidney failure, year of initiation of dialysis, network; M2: M1 + comorbid conditions; M3: M2 + hematocrit and albumin; M4: M3 + employment and insurance status |
|                                                      | Low-risk population                | Per ↑ 1 mL/min GFR                                                   | 90 540                                     | M1: 1.047 (1.044–1.050)<br>M2: 1.041 (1.038–1.044)<br>M3: 1.034 (1.029–1.039)<br>M4: 1.031 (1.026–1.036) | M1: adjusted for age, sex, race, Hispanic ethnicity, BMI, cause of kidney failure, year of initiation of dialysis, network; M2: M1 + comorbid conditions; M3: M2 + hematocrit and albumin; M4: M3 + employment and insurance status |
| Coronel <sup>3</sup>                                 | Diabetics on PD                    | > 7.7 mL/min/1.73 m <sup>2</sup><br>≤ 7.7 mL/min/1.73 m <sup>2</sup> | 56<br>44                                   | Not reported                                                                                             |                                                                                                                                                                                                                                     |
| Stel (1999 cohort) <sup>4</sup>                      | Age                                | Per ↑ 1 mL/min/1.73 m <sup>2</sup>                                   | 4644†‡                                     |                                                                                                          | Age at start of dialysis, gender, primary renal disease, treatment modality, and country                                                                                                                                            |
|                                                      | 20–44 y                            |                                                                      |                                            | 1.04 (0.99–1.09)                                                                                         |                                                                                                                                                                                                                                     |
|                                                      | 45–64 y                            |                                                                      |                                            | 1.05 (1.03–1.06)                                                                                         |                                                                                                                                                                                                                                     |
|                                                      | 65–74 y                            |                                                                      |                                            | 1.04 (1.03–1.06)                                                                                         |                                                                                                                                                                                                                                     |
|                                                      | > 75 y                             | 1.03 (1.02–1.04)                                                     |                                            |                                                                                                          |                                                                                                                                                                                                                                     |
| Sex                                                  | Per ↑ 1 mL/min/1.73 m <sup>2</sup> | 4644                                                                 |                                            | Same as above                                                                                            |                                                                                                                                                                                                                                     |
| Female                                               |                                    |                                                                      | 1.03 (1.01–1.05)                           |                                                                                                          |                                                                                                                                                                                                                                     |
| Male                                                 |                                    | 1.04 (1.03–1.05)                                                     |                                            |                                                                                                          |                                                                                                                                                                                                                                     |
| Comorbidity                                          | Per ↑ 1 mL/min/1.73 m <sup>2</sup> | 4644                                                                 |                                            | Same as above                                                                                            |                                                                                                                                                                                                                                     |
| DM                                                   |                                    |                                                                      | 1.04 (1.02–1.05)                           |                                                                                                          |                                                                                                                                                                                                                                     |
| RVD/HTN                                              |                                    |                                                                      | 1.05 (1.03–1.06)                           |                                                                                                          |                                                                                                                                                                                                                                     |
| GN                                                   |                                    |                                                                      | 1.03 (1.00–1.06)                           |                                                                                                          |                                                                                                                                                                                                                                     |
| Other                                                |                                    | 1.05 (1.03–1.06)                                                     |                                            |                                                                                                          |                                                                                                                                                                                                                                     |
| Stel (2003 cohort) <sup>4</sup>                      | Age                                | Per ↑ 1 mL/min/1.73 m <sup>2</sup>                                   | M1: 6613†<br>M2: 3375‡                     |                                                                                                          | M1: age at start of dialysis, gender, primary renal disease, treatment modality, and country; M2: M1 + diabetes, heart disease, PVD, cerebrovascular disease, malignancy                                                            |
|                                                      | 20–44 y                            |                                                                      | M1: 1.11 (1.05–1.17); M2: 1.12 (1.03–1.22) |                                                                                                          |                                                                                                                                                                                                                                     |
|                                                      | 45–64 y                            |                                                                      | M1: 1.04 (1.02–1.06); M2: 1.05 (1.03–1.07) |                                                                                                          |                                                                                                                                                                                                                                     |
|                                                      | 65–74 y                            |                                                                      | M1: 1.02 (1.01–1.04); M2: 1.02 (0.99–1.04) |                                                                                                          |                                                                                                                                                                                                                                     |
|                                                      | > 75 y                             | M1: 1.02 (1.01–1.03); M2: 1.01 (0.98–1.03)                           |                                            |                                                                                                          |                                                                                                                                                                                                                                     |
| Sex                                                  | Per ↑ 1 mL/min/1.73 m <sup>2</sup> | M1: 6613<br>M2: 3375                                                 |                                            | Same as above                                                                                            |                                                                                                                                                                                                                                     |
| Female                                               |                                    |                                                                      | M1: 1.02 (1.00–1.03); M2: 1.01 (0.99–1.04) |                                                                                                          |                                                                                                                                                                                                                                     |
| Male                                                 |                                    | M1: 1.03 (1.02–1.04); M2: 1.03 (1.01–1.05)                           |                                            |                                                                                                          |                                                                                                                                                                                                                                     |

**Table 1: Studies examining mortality among subgroups**

| Author                | Subgroup                                                                                                                                 | eGFR category                                                                                | No. patients                                                                                                               | HR (95% CI)                                                                                                                                                                                                                                                                                                                     | Adjustment variables                                                                                                                                                                                       |
|-----------------------|------------------------------------------------------------------------------------------------------------------------------------------|----------------------------------------------------------------------------------------------|----------------------------------------------------------------------------------------------------------------------------|---------------------------------------------------------------------------------------------------------------------------------------------------------------------------------------------------------------------------------------------------------------------------------------------------------------------------------|------------------------------------------------------------------------------------------------------------------------------------------------------------------------------------------------------------|
|                       | Comorbidity<br>DM<br>RVD/HTN<br>GN<br>Other                                                                                              | Per ↑ 1 mL/min/1.73 m <sup>2</sup>                                                           | M1: 6613<br>M2: 3375                                                                                                       | M1: 1.02 (1.00–1.04); M2: 1.00 (0.99–1.04)<br>M1: 1.02 (1.00–1.05); M2: 1.03 (1.00–1.07)<br>M1: 1.10 (1.05–1.15); M2: 1.11 (1.05–1.18)<br>M1: 1.02 (1.01–1.03); M2: 1.02 (1.00–1.04)                                                                                                                                            | Same as above                                                                                                                                                                                              |
|                       | Dialysis<br>HD<br>PD                                                                                                                     | Per ↑ 1 mL/min/1.73 m <sup>2</sup>                                                           | M1: 6613<br>M2: 3375                                                                                                       | M1: 1.02 (1.02–1.04); M2: 1.02 (1.01–1.04)<br>M1: 1.03 (1.01–1.05); M2: 1.03 (1.00–1.05)                                                                                                                                                                                                                                        | Same as above                                                                                                                                                                                              |
| Lassalle <sup>5</sup> | Planned HD<br><br>Planned PD<br><br>Unplanned                                                                                            | Per ↑ 5 mL/min/1.73 m <sup>2</sup>                                                           | 6672<br><br>1367<br><br>3646                                                                                               | M1: 1.26 (1.19–1.34); M2: 1.13 (1.07–1.20); M3: 1.12 (1.06–1.19)<br>M1: 1.16 (1.05–1.29); M2: 0.98 (0.88–1.10); M3: 1.00 (0.89–1.12)<br>M1: 1.20 (1.13–1.26); 1.09 (1.03–1.15); M3: 1.08 (1.03–1.15)                                                                                                                            | M1: age and gender; M2: M1 + diabetes, heart failure, dysrhythmia, PVD, CHD, malignancy, severe disability; M3: M2 + predialysis anemia care, initial treatment condition, wait listing or transplantation |
| Cooper <sup>6</sup>   | Age<br>< 60 y<br><br>≥ 60 y<br><br>Sex<br>Female<br><br>Male<br><br>Diabetes<br>No<br><br>Yes<br><br>Albumin<br>< 35 g/L<br><br>≥ 35 g/L | 10–14<br>5–7<br><br>10–14<br>5–7<br><br>10–14<br>5–7<br><br>10–14<br>5–7<br><br>10–14<br>5–7 | 180<br>194<br><br>224<br>230<br><br>143<br>143<br>261<br>281<br><br>232<br>241<br>172<br>183<br><br>68<br>81<br>325<br>336 | 39/180§<br>38/194 (not significant)<br><br>113/224<br>117/230 (not significant)<br><br>55/143<br>58/143 (not significant)<br>97/261<br>97/281 (not significant)<br><br>65/232<br>63/241 (not significant)<br>87/172<br>92/183 (not significant)<br><br>38/68<br>44/81 (not significant)<br>110/325<br>109/336 (not significant) | Unadjusted                                                                                                                                                                                                 |

**Table 1: Studies examining mortality among subgroups**

| Author                          | Subgroup                       | eGFR category    | No. patients        | HR (95% CI)        | Adjustment variables                                                                                                                                                                                          |               |
|---------------------------------|--------------------------------|------------------|---------------------|--------------------|---------------------------------------------------------------------------------------------------------------------------------------------------------------------------------------------------------------|---------------|
| Wright <sup>7</sup>             | Age<br>< 75 y                  | > 15             | 651 304             | 1.48 (1.46–1.49)   | Age at ESRD onset, height and weight at ESRD onset, race, sex, diabetic status, Charlson comorbidity index, duration of predialysis nephrology care, type of dialysis, type of vascular access, cause of ESRD |               |
|                                 |                                | 10–15            |                     | 1.17 (1.16–1.17)   |                                                                                                                                                                                                               |               |
|                                 |                                | 5–10             |                     | Reference          |                                                                                                                                                                                                               |               |
|                                 |                                | ≤ 5              |                     | 0.86 (0.85–0.86)   |                                                                                                                                                                                                               |               |
|                                 | ≥ 75 y                         | > 15             | 243 989             | 1.35 (1.33–1.37)   |                                                                                                                                                                                                               | Same as above |
|                                 |                                | 10–15            |                     | 1.11 (1.10–1.26)   |                                                                                                                                                                                                               |               |
|                                 |                                | 5–10             |                     | Reference          |                                                                                                                                                                                                               |               |
|                                 |                                | ≤ 5              |                     | 0.96 (0.94–0.97)   |                                                                                                                                                                                                               |               |
|                                 | Dialysis<br>PD                 | > 15             | 63 691              | 1.42 (1.37–1.47)   |                                                                                                                                                                                                               | Same as above |
|                                 |                                | 10–15            |                     | 1.10 (1.07–1.12)   |                                                                                                                                                                                                               |               |
|                                 |                                | 5–10             |                     | Reference          |                                                                                                                                                                                                               |               |
|                                 |                                | ≤ 5              |                     | 0.96 (0.93–0.99)   |                                                                                                                                                                                                               |               |
|                                 | HD                             | > 15             | 801 685             | 1.49 (1.47–1.50)   |                                                                                                                                                                                                               | Same as above |
|                                 |                                | 10–15            |                     | 1.17 (1.16–1.17)   |                                                                                                                                                                                                               |               |
| 5–10                            |                                | Reference        |                     |                    |                                                                                                                                                                                                               |               |
| ≤ 5                             |                                | 0.87 (0.86–0.87) |                     |                    |                                                                                                                                                                                                               |               |
| Charlson comorbidity<br>index   | < 6                            | > 15             | 204 208             | 1.46 (1.42–1.5)    | Same as above                                                                                                                                                                                                 |               |
|                                 |                                | 10–15            |                     | 1.18 (1.16–1.21)   |                                                                                                                                                                                                               |               |
|                                 |                                | 5–10             |                     | Reference          |                                                                                                                                                                                                               |               |
|                                 |                                | ≤ 5              |                     | 0.84 (0.83–0.85)   |                                                                                                                                                                                                               |               |
|                                 | 6–8                            | > 15             | 468 446             | 1.46 (1.44–1.48)   |                                                                                                                                                                                                               | Same as above |
|                                 |                                | 10–15            |                     | 1.15 (1.14–1.16)   |                                                                                                                                                                                                               |               |
|                                 |                                | 5–10             |                     | Reference          |                                                                                                                                                                                                               |               |
|                                 |                                | ≤ 5              |                     | 0.90 (0.89–0.91)   |                                                                                                                                                                                                               |               |
|                                 | > 8                            | > 15             | 222 639             | 1.37 (1.35–1.39)   |                                                                                                                                                                                                               | Same as above |
|                                 |                                | 10–15            |                     | 1.13 (1.11–1.14)   |                                                                                                                                                                                                               |               |
|                                 |                                | 5–10             |                     | Reference          |                                                                                                                                                                                                               |               |
|                                 |                                | ≤ 5              |                     | 0.94 (0.92–0.95)   |                                                                                                                                                                                                               |               |
| Rosansky<br>(2011) <sup>8</sup> | Albumin ≥ 3.5 g/dL-<br>HD only | 0–4.9            | 35 665 <sup>†</sup> | Reference          | Not specified                                                                                                                                                                                                 |               |
|                                 |                                | 5.0–9.9          |                     | 1.27               |                                                                                                                                                                                                               |               |
|                                 |                                | 10.0–14.9        |                     | 1.53               |                                                                                                                                                                                                               |               |
|                                 |                                | ≥ 15.0           |                     | 2.18 <sup>  </sup> |                                                                                                                                                                                                               |               |

**Table 1: Studies examining mortality among subgroups**

| Author                        | Subgroup       | eGFR category                      | No. patients | HR (95% CI)                                                           | Adjustment variables                                                                                                                                                                           |
|-------------------------------|----------------|------------------------------------|--------------|-----------------------------------------------------------------------|------------------------------------------------------------------------------------------------------------------------------------------------------------------------------------------------|
| Kim <sup>9</sup>              | Dialysis<br>HD | < 5                                | 47           | Not detailed—(read off graph); significant difference at 60 months    | Unadjusted                                                                                                                                                                                     |
|                               |                | ≥ 5                                | 61           |                                                                       |                                                                                                                                                                                                |
|                               | PD             | < 5                                | 52           | Not detailed (read off graph); no significant difference at 60 months | Unadjusted                                                                                                                                                                                     |
|                               |                | ≥ 5                                | 50           |                                                                       |                                                                                                                                                                                                |
| Collins <sup>10</sup>         | HD             | 10–14                              | 171          | Reference                                                             |                                                                                                                                                                                                |
|                               |                | 5–7                                | 191          | 0.97 (0.66–1.41)                                                      |                                                                                                                                                                                                |
| Rosansky (2009) <sup>11</sup> | Age 65–74 y    | 5–9.9<br>> 15                      |              | Not provided                                                          |                                                                                                                                                                                                |
| Wilson <sup>12</sup>          | HD only        | < 5.0                              | 46           | Reference                                                             | Sex, age, months at CKD clinic, comorbidity (cardiac disease, PVD, diabetes, antihypertensive use)                                                                                             |
|                               |                | 5.0–10.0                           | 180          | 1.58 (0.54–4.65) <sup>¶</sup>                                         |                                                                                                                                                                                                |
|                               |                | > 10.0                             | 45           | 1.68 (0.65–4.32)                                                      |                                                                                                                                                                                                |
| Tang <sup>13</sup>            | PD only        | Per ↓ 1 mL/min/1.73 m <sup>2</sup> | 233          | 1.53 (1.20–3.99)                                                      | Age, gender, diabetic status                                                                                                                                                                   |
| Shiao <sup>14</sup>           | PD only        | Per ↑ 1 mL/min/1.73 m <sup>2</sup> | 275          | 1.18 (1.02–1.37)                                                      | Age, sex, level of education, occupational activity, nephrology referral, implantation of catheters, initiation of dialysis, comorbidities (diabetes, CAD, congestive heart failure), lab data |
| Hwang <sup>15</sup>           | HD only        | Per ↑ 1 mL/min/1.73 m <sup>2</sup> | 23 551       | 1.15 (1.14–1.17)                                                      | Age, sex, diabetes, GN, HTN, chronic TIN, CAD, CHF CVD, malignancy, liver cirrhosis, TB, dialysis initiation year                                                                              |
| Clark <sup>16</sup>           | HD only        | Per ↑ 1 mL/min/1.73 m <sup>2</sup> | 25 910       | 1.01 (1.01–1.02)                                                      | Age, sex, ethnicity, DM, GN, RVD, modified CMI score, CAD, CHR, HTN, CVD, PVD, lung disease, malignancy, albumin, vascular access, late referral                                               |

Note: BMI = body mass index; CAD = coronary artery disease; CHD: coronary heart disease; CHF = congestive heart failure; CKD = chronic kidney disease; CMI= Charlson Comorbidity Index; CVD = cardiovascular disease; DM = diabetes mellitus; eGFR = estimated glomerular filtration rate; ESRD = end-stage renal disease; GN = glomerulonephritis; HD = hemodialysis; HR = hazard ratio; HTN = hypertension; M = model; PD = peritoneal dialysis; PVD = peripheral vascular disease; RVD = renal vascular disease; TB = tuberculosis; TIN = tubulointerstitial nephritis.

\*Without diabetes, congestive heart failure, or heart disease.

†Not presenting unadjusted analyses.

‡Number of patients in each subgroup not detailed for each model.

§Hazard ratio not written out (read off of table).

||Confidence intervals not presented.

¶Odds ratio, year 2 mortality (year 1 mortality not presented).

## References

1. Traynor J, Simpson K, Geddes C, Deighan C, Fox J. Early initiation of dialysis fails to prolong survival in patients with end-stage renal failure. *J Am Soc Nephrol*. 2002;13:2125-32.
2. Kazmi W, Gilbertson D, Obrador G, et al. Effect of comorbidity on the increased mortality associated with early initiation of dialysis. *Am J Kidney Dis* 2005;46:887-96.
3. Coronel F, Cigarran S, Herrero J. Early initiation of peritoneal dialysis in diabetic patients. *Scand J Urol Nephrol* 2009;43:148-53.
4. Stel V, Dekker F, Ansell D, et al. Residual renal function at the start of dialysis and clinical outcomes. *Nephrol Dial Transplant* 2009;24:3175-82.
5. Lassalle M, Labeeuw M, Frimat L, et al. Age and comorbidity may explain the paradoxical association of an early dialysis start with poor survival. *Kidney Int* 2010;77.
6. Cooper B, Branley P, Bulfone L, Collins JF, Craig JC, Fraenkel MB, et al. A randomized, controlled trial of early versus late initiation of dialysis. *N Engl J Med* 2010;363:609–19.
7. Wright S, Klausner D, Baird B, et al. Timing of dialysis initiation and survival in ESRD. *Clin J Am Soc Nephrol* 2010;5:1828-35.
8. Rosansky S, Eggers P, Jackson K, Glasscock R, Clark W. Early start of hemodialysis may be harmful. *Arch Intern Med* 2011;171:396-403.
9. Kim S, Kim N. The effect of residual renal function at the initiation of dialysis on patient survival. *Korean J Intern Med* 2009;24:55-62.
10. Collins J, Cooper B, Branley P, et al. Outcomes of patients with planned initiation of hemodialysis in the IDEAL trial. *Contrib Nephrol* 2011;171:1-9.
11. Rosansky S, Clark W, Eggers P, Glasscock R. Initiation of dialysis at higher GFRs: is the apparent rising tide of early dialysis harmful or helpful? *Kidney Int* 2009;76:257-61.
12. Wilson B, Harwood L, Locking-Cusolito H, et al. Optimal timing of initiation of chronic hemodialysis? *Hemodial* 2007;11:263-9.
13. Tang S, Ho Y, Tang A, et al. Delaying initiation of dialysis till symptomatic uraemia--is it too late? *Nephrol Dial Transplant* 2007;22:1926-32.
14. Shiao C, Huang J, Chien K, Chuang H, Chen Y, Wu K. Early initiation of dialysis and late implantation of catheters adversely affect outcomes of patients on chronic peritoneal dialysis. *Perit Dial Int* 2008;28:73-81.
15. Hwang S-J, Yang W-C, Lin M-Y, May L-W, Chen H-C, Taiwan Society of Nephrology. Impact of the clinical conditions at dialysis initiation on mortality in incident haemodialysis patients: a national cohort study in Taiwan. *Nephrol Dial Transplant* 2010;25:2616-24.
16. Clark W, Na Y, Rosansky S, et al. Association between estimated glomerular filtration rate at initiation of dialysis and mortality. *CMAJ* 2011;183:47-54.
